# Supplementary material for: De novo transcriptome sequencing and gene expression analysis reveal potential mechanisms of seed abortion in dove tree (Davidia involucrata Baill.)
Source: PubMed Central journal article supplement (PMC4828838; doi:10.1186/s12870-016-0772-x), 2016-04-12
Supplement: 12870_2016_772_MOESM3_ESM.pdf [file 12870_2016_772_MOESM3_ESM.pdf]

**Table S1. Summary for the annotation of unigenes against database of other species**

| Species                     | Unigene | Annotation proportion |
|-----------------------------|---------|-----------------------|
| <i>Arabidopsis thaliana</i> | 26,085  | 35.30%                |
| <i>Vitis vinifera</i>       | 28,809  | 38.99%                |
| <i>Theobroma cacao</i>      | 29,450  | 39.86%                |
| <i>Populus trichocarpa</i>  | 28,093  | 38.02%                |
| <i>Eucalyptus grandis</i>   | 26,534  | 35.91%                |
| <i>Amborella trichopoda</i> | 25,247  | 34.17%                |
