# Supplementary material for: De novo transcriptome sequencing and gene expression analysis reveal potential mechanisms of seed abortion in dove tree (Davidia involucrata Baill.)
Source: PubMed Central journal article supplement (PMC4828838; doi:10.1186/s12870-016-0772-x), 2016-04-12
Supplement: 12870_2016_772_MOESM4_ESM.pdf [file 12870_2016_772_MOESM4_ESM.pdf]

**Table S2. Correlation coefficient between RPKM of unigenes of samples**

| Samples | Di-1N  | Di-1A  | Di-2N  | Di-2A  | Di-3N  | Di-3A  |
|---------|--------|--------|--------|--------|--------|--------|
| Di-1N   | 1      | 0.0187 | 0.8252 | 0.0099 | 0.8298 | 0.0186 |
| Di-1A   | 0.0187 | 1      | 0.0553 | 0.9601 | 0.0807 | 0.9598 |
| Di-2N   | 0.8252 | 0.0553 | 1      | 0.0299 | 0.7831 | 0.0542 |
| Di-2A   | 0.0099 | 0.9601 | 0.0299 | 1      | 0.06   | 0.9426 |
| Di-3N   | 0.8298 | 0.0807 | 0.7831 | 0.06   | 1      | 0.0915 |
| Di-3A   | 0.0186 | 0.9598 | 0.0542 | 0.9426 | 0.0915 | 1      |
