# Supplementary material for: De novo transcriptome sequencing and gene expression analysis reveal potential mechanisms of seed abortion in dove tree (Davidia involucrata Baill.)
Source: PubMed Central journal article supplement (PMC4828838; doi:10.1186/s12870-016-0772-x), 2016-04-12
Supplement: 12870_2016_772_MOESM6_ESM.pdf [file 12870_2016_772_MOESM6_ESM.pdf]

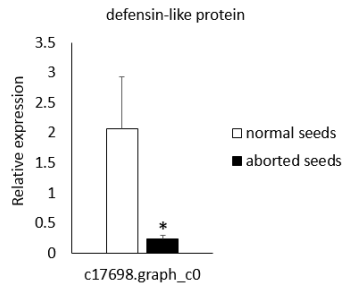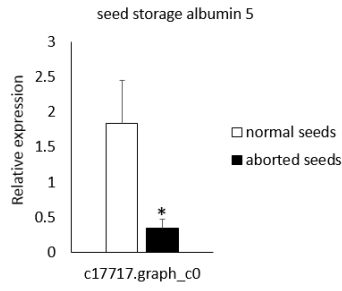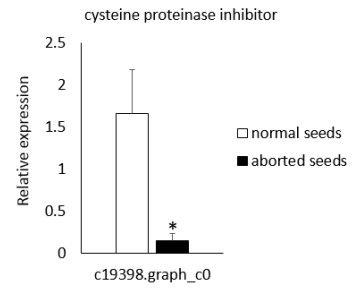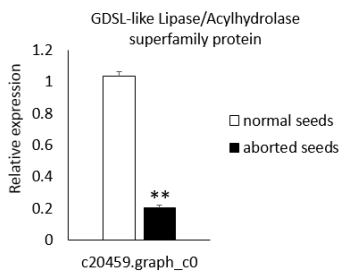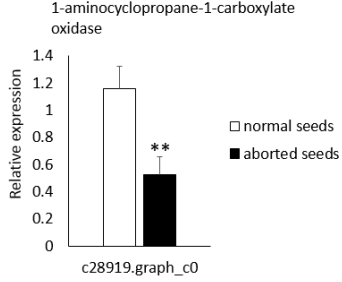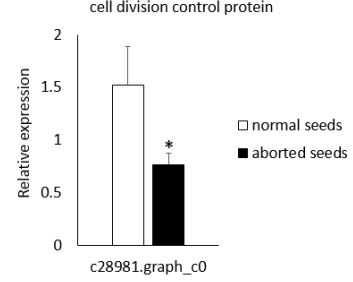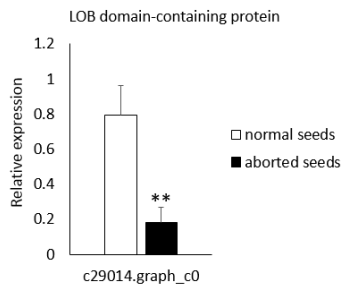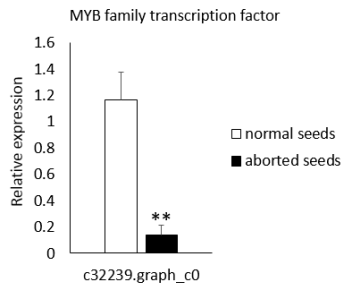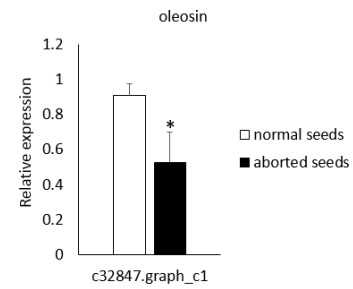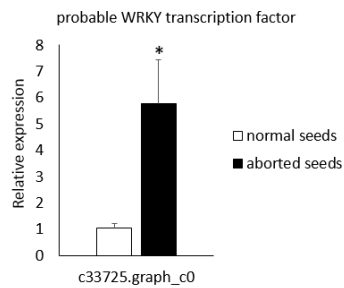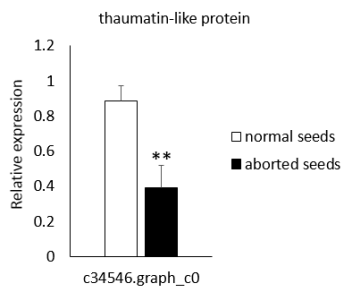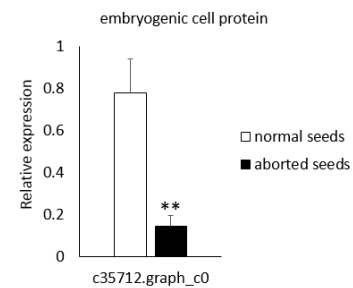

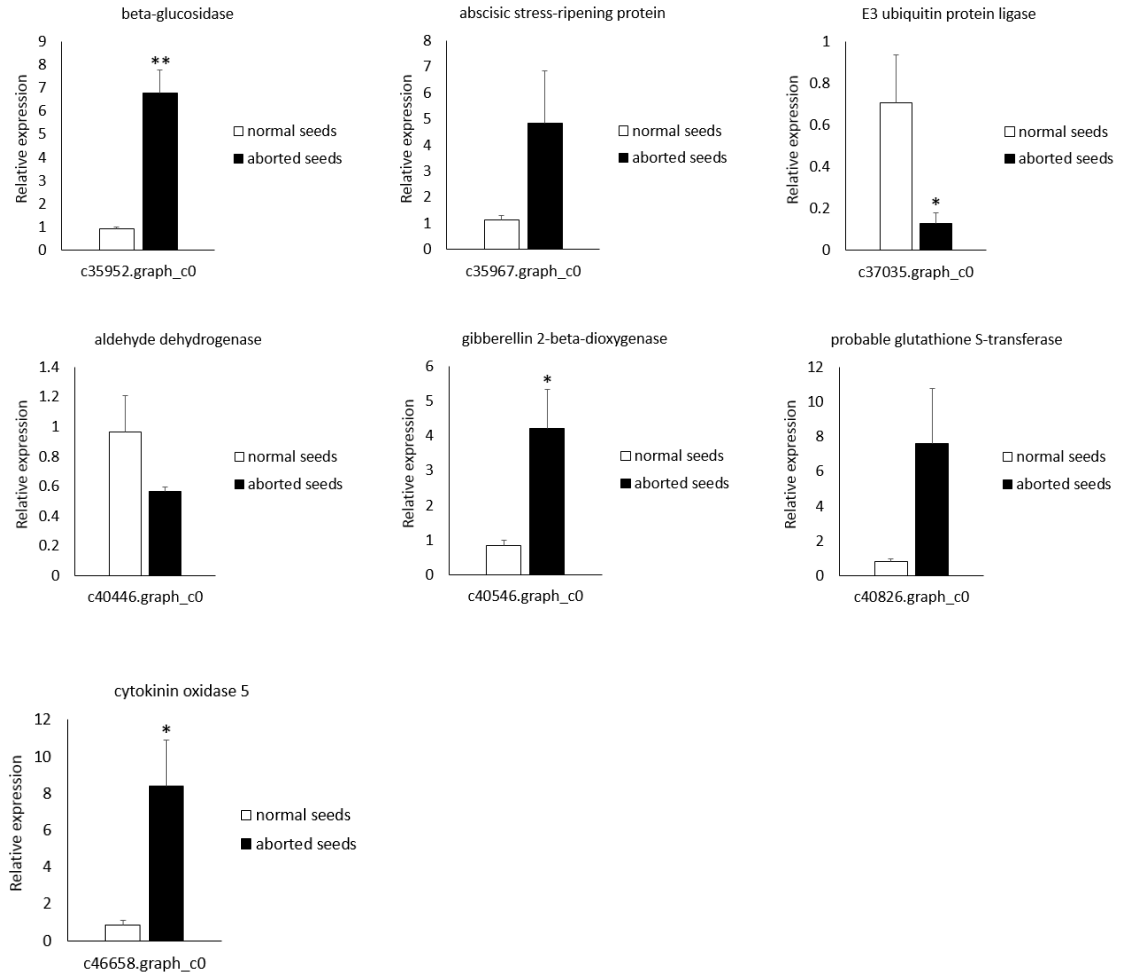

**Figure S1. Expression levels of DEGs in normal and aborted seeds detected by qPCR**

The results were obtained from three independent seed samples. Error bars are means  $\pm$  SD of three replicates. The significance between the samples was tested by ANOVA. \*\*Significant at  $p < 0.01$  level; \*significant at  $p < 0.05$  level.
