# Supplementary material for: De novo transcriptome sequencing and gene expression analysis reveal potential mechanisms of seed abortion in dove tree (Davidia involucrata Baill.)
Source: PubMed Central journal article supplement (PMC4828838; doi:10.1186/s12870-016-0772-x), 2016-04-12
Supplement: 12870_2016_772_MOESM7_ESM.pdf [file 12870_2016_772_MOESM7_ESM.pdf]

**Table S3. Primer sequences used in qPCR**

| Primer   | Sequence                | Target          | Annotation                         |
|----------|-------------------------|-----------------|------------------------------------|
| 17698F   | CAATGAGAAGCAAGAAGA      | c17698.graph_c0 | defensin-like protein              |
| 17698R   | TTGTCTGTGTGAAAGTTT      |                 |                                    |
| 17717F   | CAAAGCTCACAGTCGTAG      | c17717.graph_c0 | seed storage albumin 5             |
| 17717R   | TTATAGTGGTGC GG TAGG    |                 |                                    |
| 19398F   | GAAGCATCATAGGAGTCT      | c19398.graph_c0 | cysteine proteinase inhibitor      |
| 19398R   | TTGTAACCCATAATTCTACTG   |                 |                                    |
| 20459F   | CCTTAACATACCTGACATTA    | c20459.graph_c0 | GDSL-like Lipase/Acylhydrolase     |
| 20459R   | ACCAACGAGTAGTCTATT      |                 | superfamily protein                |
| 28919F   | AATGGCAAGTATAAGAGTGT    | c28919.graph_c0 | 1-aminocyclopropane-1-carboxylate  |
| 28919R   | GGATTGTAGAATGAGGCTAT    |                 | oxidase                            |
| 28981F   | TCAACTCATTACTCAACT      | c28981.graph_c0 | cell division control protein      |
| 28981R   | CCCAACAACCTAAATATG      |                 |                                    |
| 29014F   | TTCTGGCGAATCATCAAC      | c29014.graph_c0 | LOB domain-containing protein      |
| 29014R   | GGCTCATTGTCATTTCTT      |                 |                                    |
| 32239F   | GAAGTTCAGACTAGGTAG      | c32239.graph_c0 | MYB family transcription factor    |
| 32239R   | TTCATCATTACATCAGA       |                 |                                    |
| 32847F   | GCGATAACAGTGTTCTTT      | c32847.graph_c1 | oleosin                            |
| 32847R   | GATCCATGACAGTACAGT      |                 |                                    |
| 33725F   | CAAGTTCAACGCTTATCG      | c33725.graph_c0 | probable WRKY transcription factor |
| 33725R   | GTAGACTTCTCAATAGGATGT   |                 |                                    |
| 34546F   | GCAGAAGGTGACCAATAG      | c34546.graph_c0 | thaumatin-like protein             |
| 34546R   | GGCTTACTCTTATGCTTATGAT  |                 |                                    |
| 35712F   | GTAACGGAAATTCAGACT      | c35712.graph_c0 | embryogenic cell protein           |
| 35712R   | AATATCACGATAATAGTAGTAGT |                 |                                    |
| 35952F   | TACCTTGAACACCATCTT      | c35952.graph_c0 | beta-glucosidase                   |
| 35952R   | TGTAACCTTGACTCCATT      |                 |                                    |
| 35967F   | CACCACCACCTCTTACAC      | c35967.graph_c0 | abscisic stress-ripening protein   |
| 35967R   | GTGCTTCTCCTCTTTCTTGT    |                 |                                    |
| 37035F   | GGCTACCTCAATCAATCTC     | c37035.graph_c0 | E3 ubiquitin protein ligase        |
| 37035R   | CCTAAGTCCTCGTTACATAC    |                 |                                    |
| 40446F   | CATACCTGTTACACTTGAG     | c40446.graph_c0 | aldehyde dehydrogenase             |
| 40446R   | GTTCTGTCCACTTGATTG      |                 |                                    |
| 40546F   | CTAACAGCCAATCCAGAA      | c40546.graph_c0 | gibberellin 2-beta-dioxygenase     |
| 40546R   | GAATCTCACAAGCCATCT      |                 |                                    |
| 40826F   | TACGAATACATTGAACAAG     | c40826.graph_c0 | probable glutathione S-transferase |
| 40826R   | GGACTCTTATGGATAG        |                 |                                    |
| 46658F   | CGAATCAACCGCCAATAC      | c46658.graph_c0 | cytokinin oxidase 5                |
| 46658R   | CCACATAAGGAAGGTCAGT     |                 |                                    |
| DiActinF | GGTCGTACAACCTGGTATT     | c45663.graph_c0 | actin                              |
| DiActinR | GAGCATAGCCTTCATAGAT     |                 |                                    |
